# Supplementary material for: Defining the role of corticotropin releasing factor binding protein in alcohol consumption
Source: PubMed Central journal article supplement (PMC5314120; doi:10.1038/tp.2016.208), 2016-11-15
Supplement: tp2016208x3.pdf [file tp2016208x3.pdf]

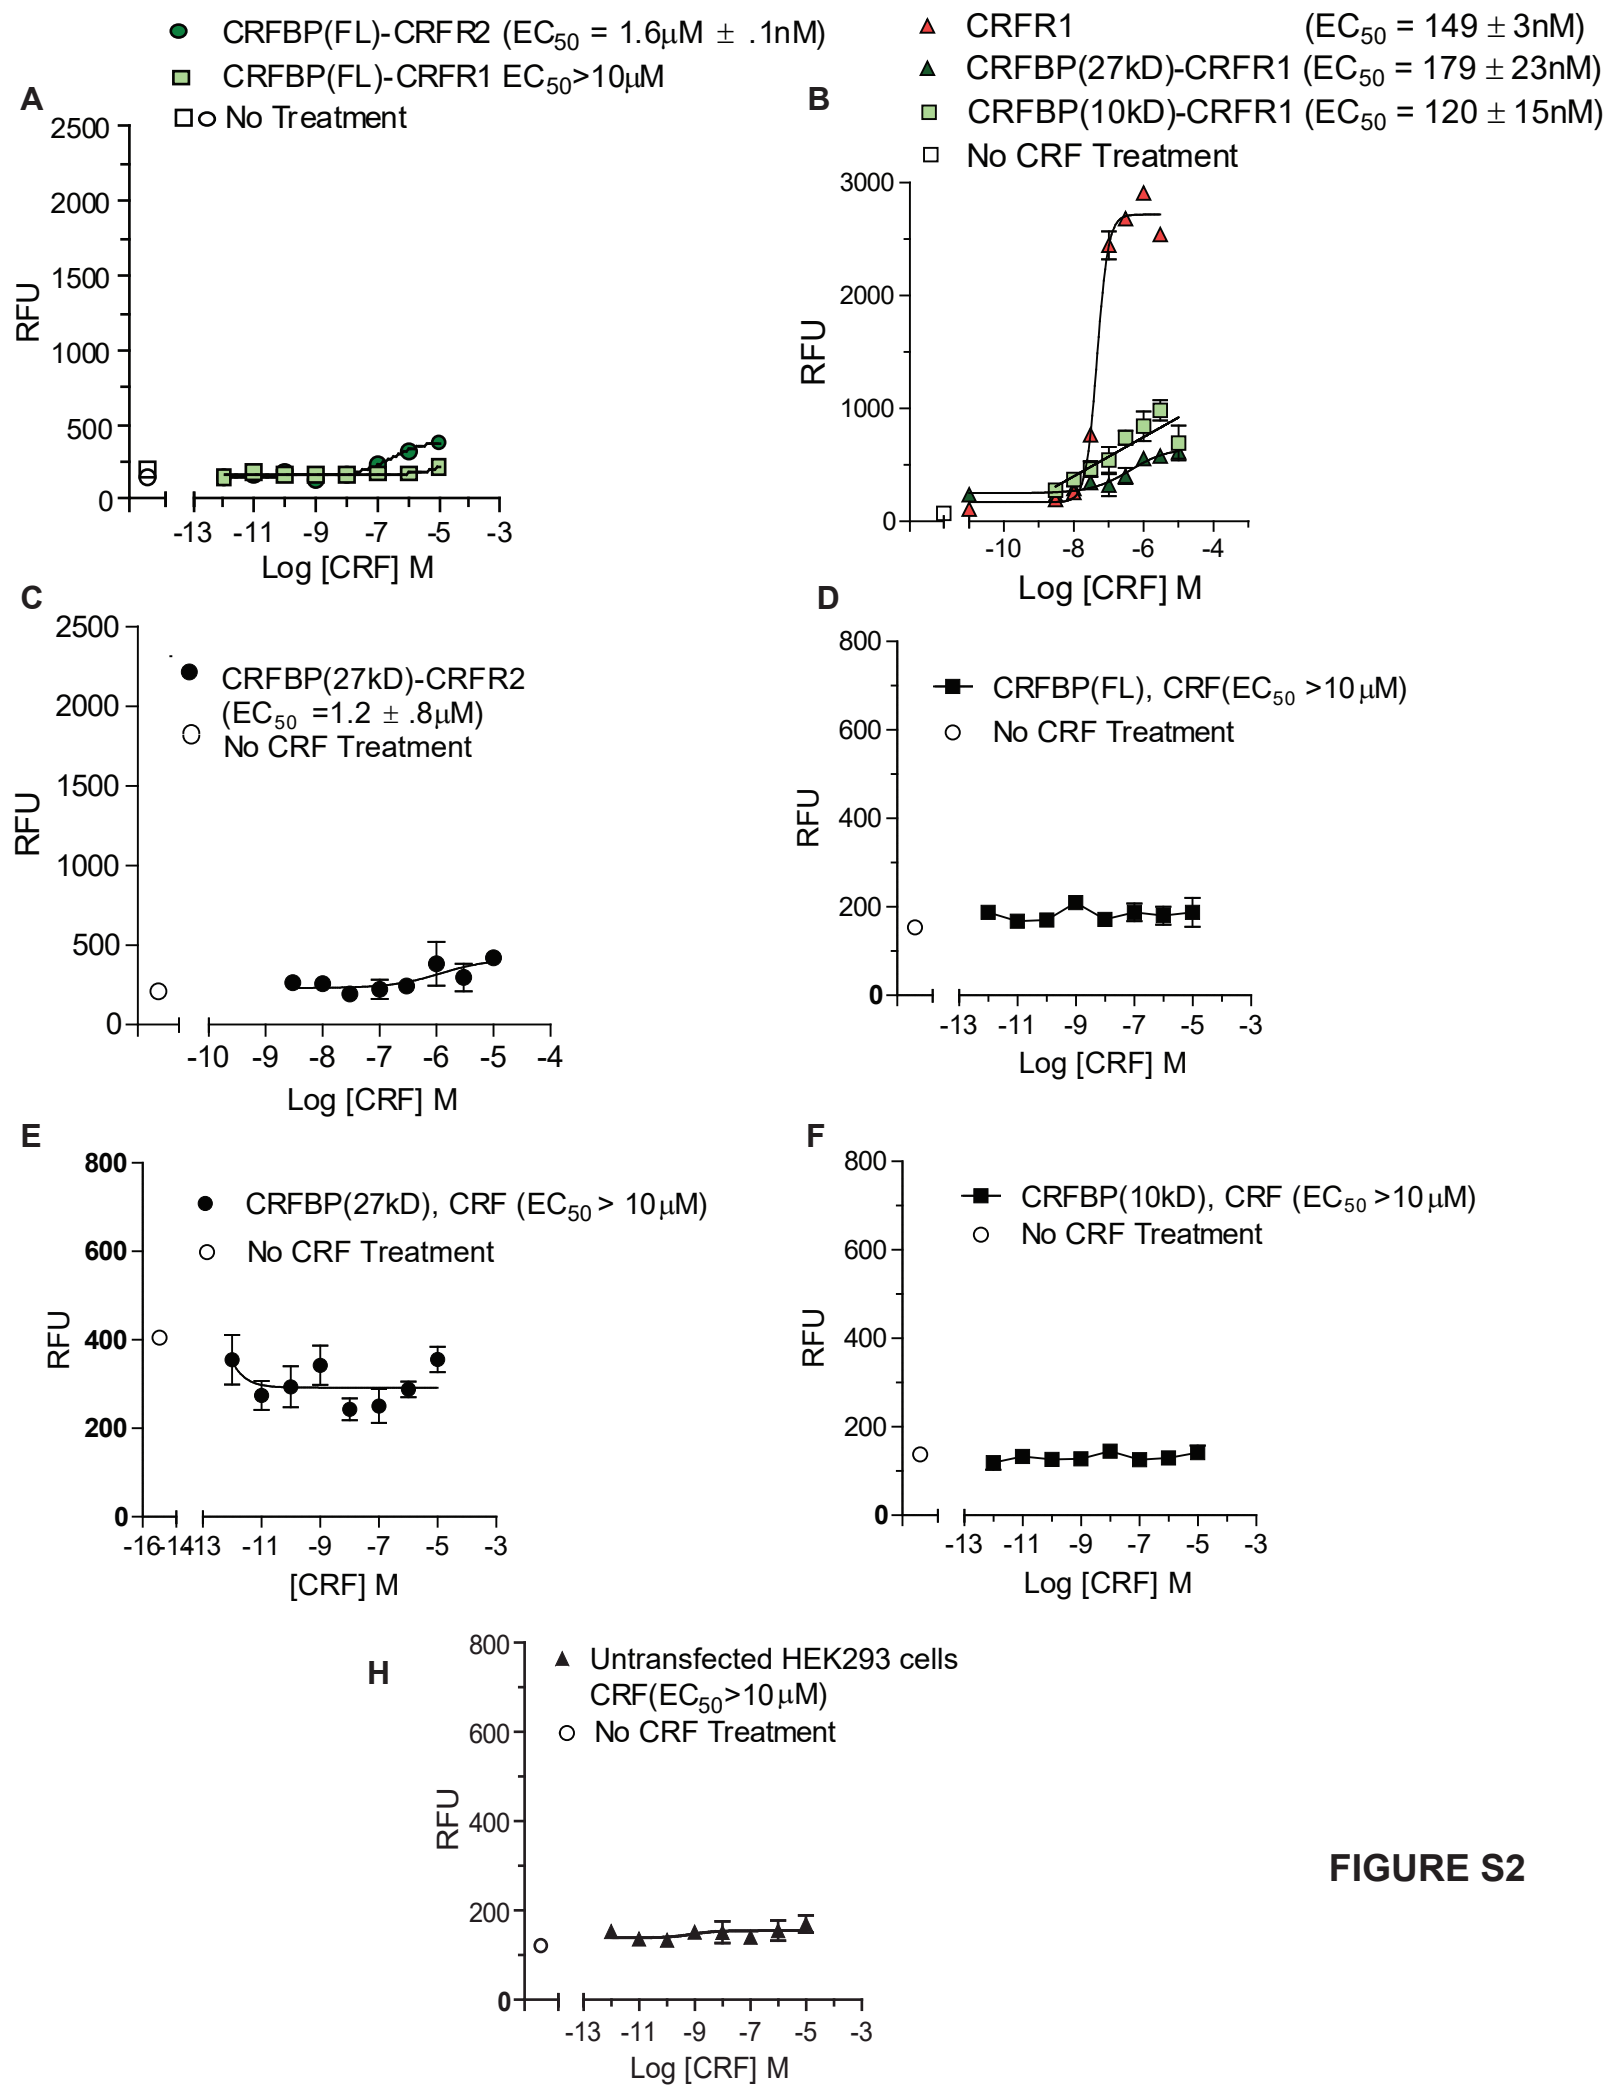

**FIGURE S2**
