# Supplementary material for: Defining the role of corticotropin releasing factor binding protein in alcohol consumption
Source: PubMed Central journal article supplement (PMC5314120; doi:10.1038/tp.2016.208), 2016-11-15

# FIGURE S4

**A**

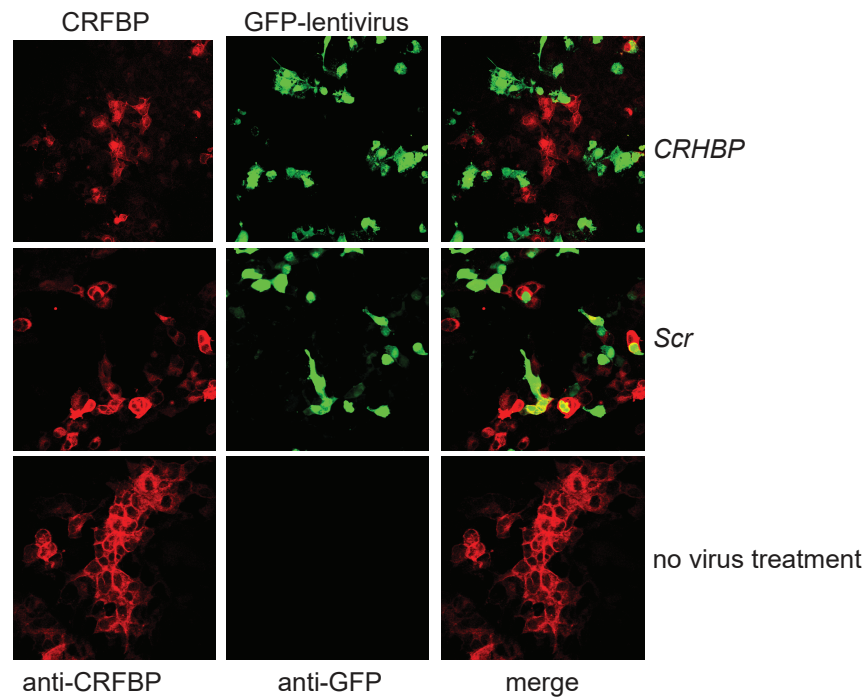

**B**

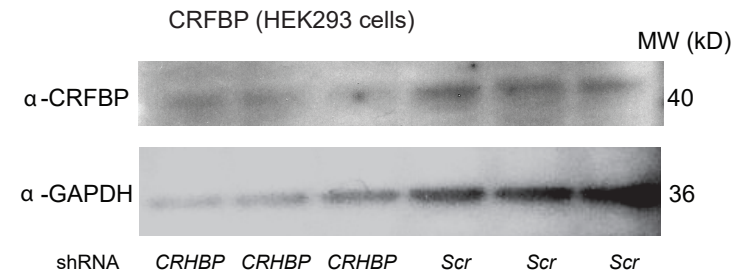

**C**

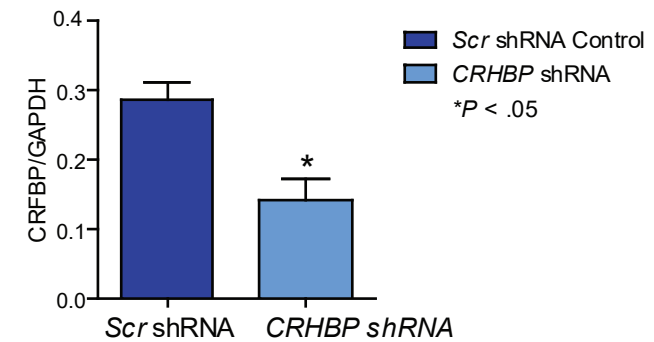

**D**

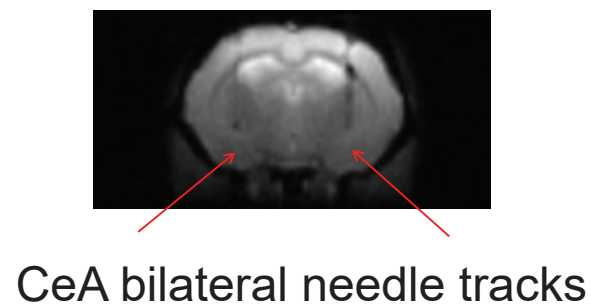

**E**

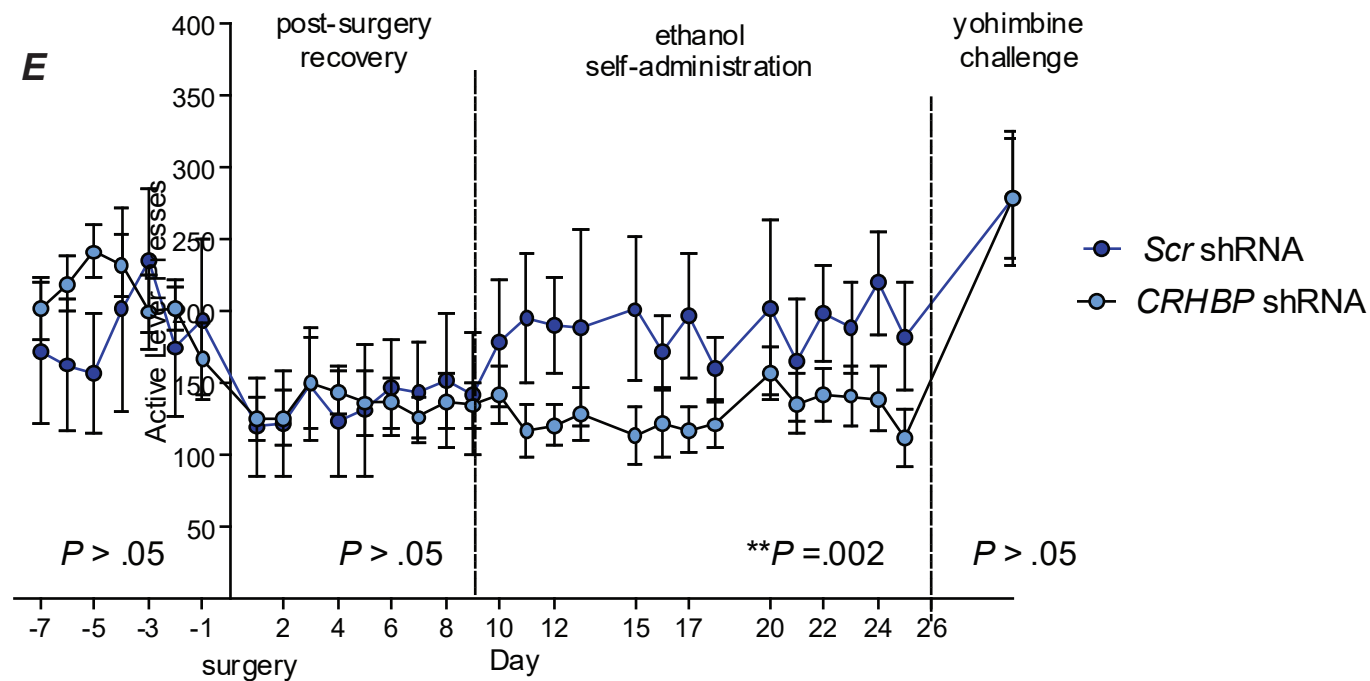

Supplement: tp2016208x5.pdf [file tp2016208x5.pdf]
